# Supplementary material for: Endocrine-Sensitive Disease Rate in Postmenopausal Patients With Estrogen Receptor–Rich/ERBB2-Negative Breast Cancer Receiving Neoadjuvant Anastrozole, Fulvestrant, or Their Combination: A Phase 3 Randomized Clinical Trial
Source: PubMed Central journal article supplement (PMC10797521; doi:10.1001/jamaoncol.2023.6038), 2024-01-18
Supplement: jamaoncol-e236038-s003.pdf [file jamaoncol-e236038-s003.pdf]

## Data Sharing Statement

Ma. Endocrine-Sensitive Disease Rate in Postmenopausal Patients With Estrogen Receptor–Rich/ERBB2-Negative Breast Cancer Receiving Neoadjuvant Anastrozole, Fulvestrant, or Their Combination. *JAMA Oncol.* Published January 18, 2024.  
doi:10.1001/jamaoncol.2023.6038

### Data

**Data available:** Yes

**Data types:** Deidentified participant data

**How to access data:** NCTN/NCORP Data Archive (<https://nctn-data-archive.nci.nih.gov/>)

**When available:** beginning date: 01-01-2024

### Supporting Documents

**Document types:** None

### Additional Information

**Who can access the data:** Anyone requesting data will go through a formal review process including verifying the availability of data, conducting a review of any existing agreements that may have implications for the project, and ensuring that any transfer is in compliance with the IRB.

**Types of analyses:** Upon formal review of request data will be made available for any purpose.

**Mechanisms of data availability:** Data will be made available with a signed data access agreement.
